# Supplementary material for: Targeted regulation and optimization of multifunctional phase transition materials by novel void occupancy engineering
Source: Royal Society of Chemistry journal article supplement (doi:10.1039/d3sc02652c), 2023-01-01
Supplement: d3sc02652c1.pdf [file d3sc02652c1.pdf]

## Supplementary information

### Targeted regulation and optimization of multifunctional phase transition materials by novel void occupancy engineering

Zhi-Jie Wang,<sup>a</sup> Hao-Fei Ni,<sup>b</sup> Tie Zhang,<sup>a</sup> Jie Li,<sup>a</sup> Meng-Meng Lun,<sup>a</sup> Da-Wei Fu,<sup>\*a</sup> Zhi-Xu Zhang,<sup>\*b</sup>  
and Yi Zhang<sup>\*b</sup>

<sup>a</sup> Ordered Matter Science Research Center, Jiangsu Key Laboratory for Science and Applications of Molecular Ferroelectrics, Southeast University, Nanjing 211189, People's Republic of China. E-mail: dawei@seu.edu.cn

<sup>b</sup> Institute for Science and Applications of Molecular Ferroelectrics, Key Laboratory of the Ministry of Education for Advanced Catalysis Materials, Zhejiang Normal University, Jinhua 321004, People's Republic of China. E-mail: zhangzhixu@zjnu.edu.cn, yizhang1980@seu.edu.cn

## Experimental Section

### Synthesis

For the synthesis of [TMEA][Cd(SCN)<sub>3</sub>], ethyltrimethylammonium chloride was prepared from iodide using Ag<sub>2</sub>CO<sub>3</sub> and hydrochloric acid in a stoichiometric ratio. Then, ethyl trimethyl ammonium chloride (5 mmol), cadmium nitrate tetrahydrate (5 mmol) and potassium thiocyanate (15 mmol) were added to the solution mixture including water, methanol and acetonitrile in the ratio of 1:1:1 under stirring at room temperature, and the clarified solution was filtered through filter paper and left to evaporate slowly at room temperature for several days to obtain colorless and transparent rod-shaped crystals. As for the synthesis of [DEDMA][Cd(SCN)<sub>3</sub>], [TEMA][Cd(SCN)<sub>3</sub>], and [TEA][Cd(SCN)<sub>3</sub>], except that [DEDMA][Cd(SCN)<sub>3</sub>] requires the preparation of diethyl dimethylammonium chloride by using hydrochloric acid and diethyl dimethyl ammonium hydroxide in a stoichiometric manner, the other synthesis steps are similar to that of [TMEA][Cd(SCN)<sub>3</sub>]. A few days later, colorless transparent rod-shaped single crystals of [DEDMA][Cd(SCN)<sub>3</sub>], [TEMA][Cd(SCN)<sub>3</sub>], and [TEA][Cd(SCN)<sub>3</sub>] were collected (Fig. S1).

### Detailed methods of measurements

**Single-crystal X-ray diffraction.** Single crystal X-ray diffraction data for [TMEA][Cd(SCN)<sub>3</sub>], [DEDMA][Cd(SCN)<sub>3</sub>], [TEMA][Cd(SCN)<sub>3</sub>], and [TEA][Cd(SCN)<sub>3</sub>] were obtained using a Rigaku Saturn 724 diffractometer using Mo-K $\alpha$  Radiation ( $\lambda = 0.71073 \text{ \AA}$ ). Data collection, cell refinement, and data restoration are performed using Rigaku Crystal Clear 1.3.5. The crystal structure is solved using a direct method, and then refined by full-matrix least-squares methods based on  $F^2$  with the SHELXLTL software package. All non-hydrogen atoms are refined in an anisotropic manner, and the positions of all hydrogen atoms are generated geometrically. Import the generated CIF file into DIAMOND to draw the corresponding asymmetric cell diagram and stack diagram, and calculate the selected bond distances and angles through Mercury. Table S1-S4 and S8-S11 summarize the data collection and bond length and bond angle of these crystals. These X-ray crystal structures have been stored at the Cambridge Crystallography Data Center (storage number CCDC 2265083-2265089) and are available free of charge from CCDC at [www.ccdc.cam.ac.uk/getstructures](http://www.ccdc.cam.ac.uk/getstructures).

**Differential Scanning Calorimetry (DSC).** DSC measurement was performed on powder sample of [TMEA][Cd(SCN)<sub>3</sub>], [DEDMA][Cd(SCN)<sub>3</sub>], [TEMA][Cd(SCN)<sub>3</sub>], and [TEA][Cd(SCN)<sub>3</sub>] by a

NETZSCH DSC 214 Polyma instrument. The sample was placed in aluminum crucible under nitrogen at atmospheric pressure. The experiment was conducted under nitrogen and atmospheric pressure, with heating and cooling rates of  $20 \text{ K} \cdot \text{min}^{-1}$ .

**Dielectric Measurements.** The powder is pressed into thin sheets, and the copper wire and sample are made into electrodes using silver glue. Dielectric measurements were performed at different temperatures on the Tonghui TH2828A instrument.

**Second Harmonic Generation (SHG).** Temperature-varying SHG of  $[\text{TEA}][\text{Cd}(\text{SCN})_3]$  were performed using a low-divergence, unexpanded laser beam (pulsed Nd: YAG with a wavelength of 1064 nm) with a pulse duration of 10 ns at a temperature range of 330-390 K.

**Powder X-ray diffraction.** Powder X-ray diffraction (PXRD) measurements were performed at room temperature on a Rigaku D/MAX 2000 PC X-ray diffractometer. The diffraction pattern is recorded at  $2\theta$  between  $5\text{-}50^\circ$  within the range, the step size is  $0.02^\circ$ .

**Density Functional Theory (DFT) Calculations.** The Density functional theory were carried out with the Vienna Ab Initio Simulation Package (VASP)<sup>1</sup>. The projector-augmented wave method (PAW)<sup>2</sup> and Perdew-Burke-Ernzerhof (PBE)<sup>3</sup> functional were used to describe the electron-ion and the exchange-correlation interactions respectively. The energy barrier for the rotation of cations were calculated based on crystal structures of the  $[\text{DEDMA}][\text{Cd}(\text{SCN})_3]$ ,  $[\text{TEMA}][\text{Cd}(\text{SCN})_3]$  and  $[\text{TEA}][\text{Cd}(\text{SCN})_3]$ . The optimization by structural relaxation is required for  $[\text{TEMA}][\text{Cd}(\text{SCN})_3]$  and  $[\text{TEA}][\text{Cd}(\text{SCN})_3]$ . In this study, the Brillouin area was divided by the sampled grids of  $2 \times 2 \times 1$  Monkhorst-Pack mesh of k-points for  $[\text{DEDMA}][\text{Cd}(\text{SCN})_3]$  and  $[\text{TEA}][\text{Cd}(\text{SCN})_3]$ . A k-point grid with  $2 \times 1 \times 2$  Monkhorst-Pack mesh was chosen for the 4ethy. A cutoff energy of 500 eV was adopted for all simulations. In the self-consistent calculation, the energy convergence criteria was set to  $10^{-5} \text{ eV}$ , and the geometric configuration was completely relaxed until the force on each atom reached  $0.02 \text{ eV}/\text{\AA}$ . A cutoff energy of 500 eV was adopted for all simulations.

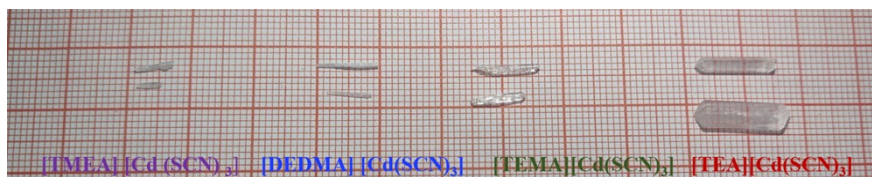

Fig. S1 Obtained crystal photos of four compounds.

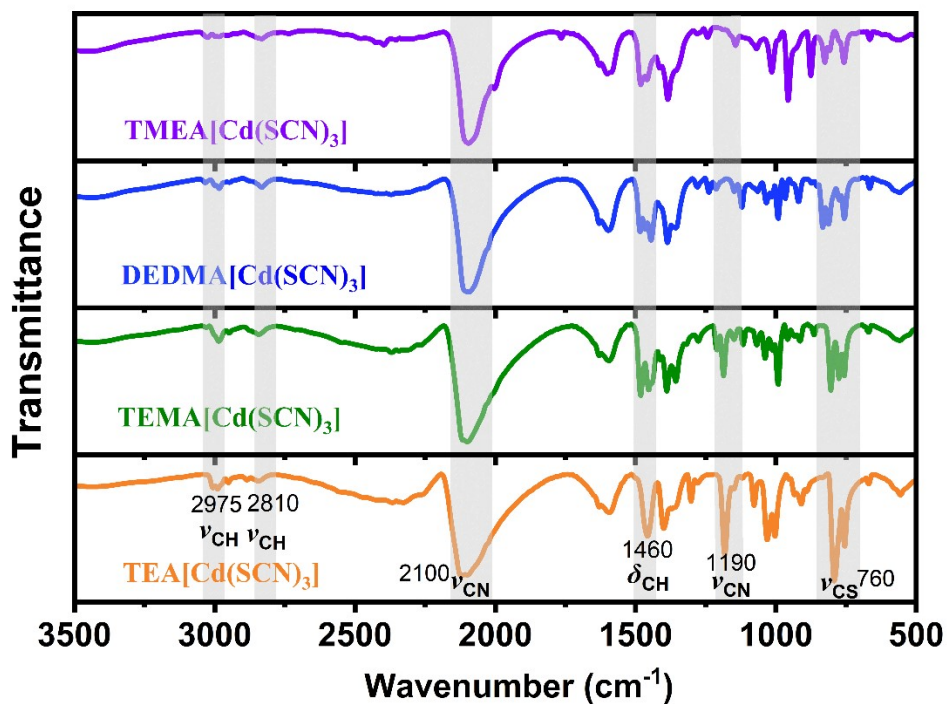

Fig. S2 Infrared (IR) spectrums of four compounds.

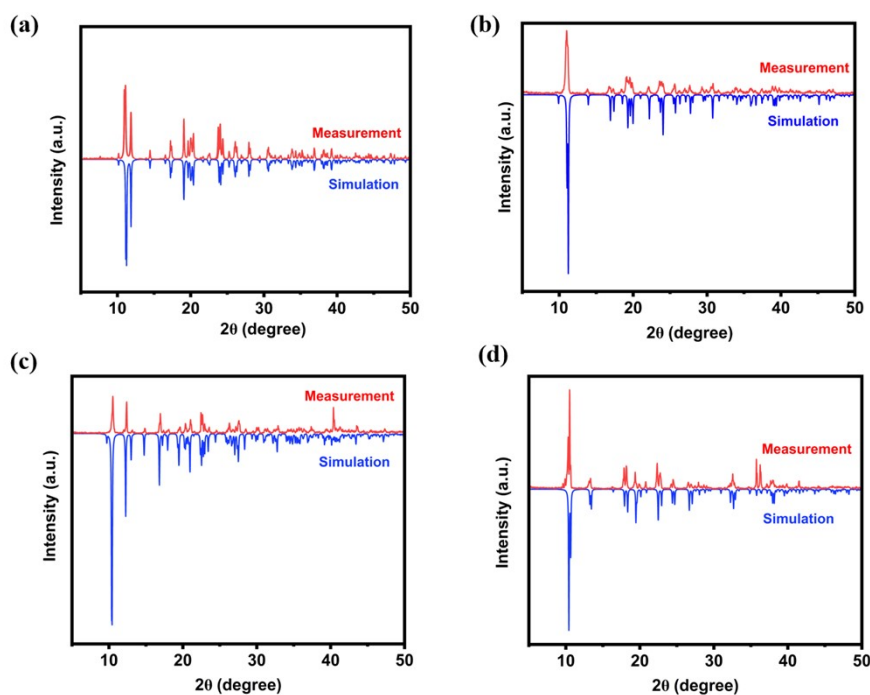

Fig. S3 The measured and simulated PXRD patterns of four compounds match well, verifying the

phase purity of the compounds [TMEA][Cd(SCN)<sub>3</sub>] (a), [DEDMA][Cd(SCN)<sub>3</sub>] (b), [TEMA][Cd(SCN)<sub>3</sub>] (c) and [TEA][Cd(SCN)<sub>3</sub>] (d).

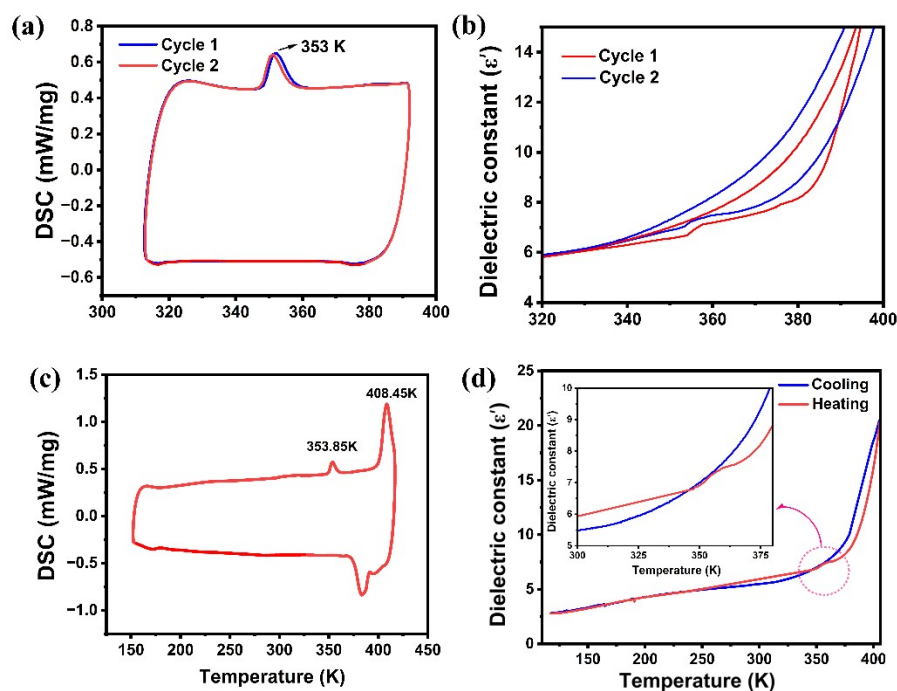

**Fig. S4** (a), (b) DSC and dielectric measurements of [TMEA][Cd(SCN)<sub>3</sub>] under two consecutive cycles (c) DSC curve of polycrystalline sample of [TMEA][Cd(SCN)<sub>3</sub>] during heating-cooling cycle (150-408 K). [TMEA][Cd(SCN)<sub>3</sub>] has a melting point of 408 K and exhibits a melting-solidification peak. (b) The temperature dependent dielectric constant ( $\epsilon'$ ) of [TMEA][Cd(SCN)<sub>3</sub>] was measured during a heating-cooling cycle (120-403 K). An irreversible dielectric switching occurs at about 354 K.

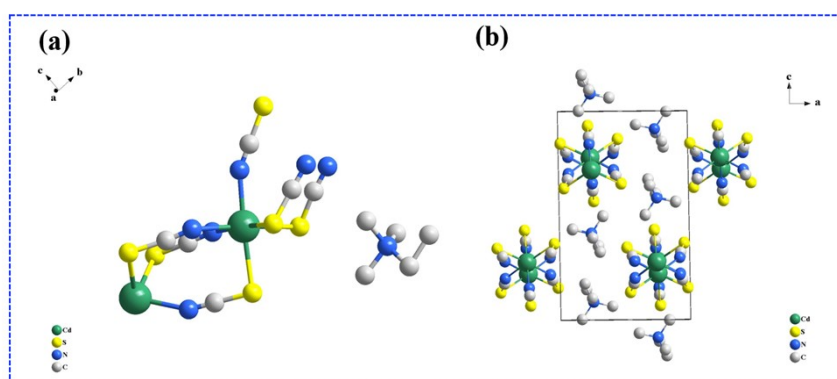

**Fig. S5** (a) Molecular structure of [TMEA][Cd(SCN)<sub>3</sub>] at 298 K (containing [Cd(SCN)<sub>3</sub>]<sup>-</sup> chains and [DEDMA]<sup>+</sup> cations). (b) crystal packing structures of [TMEA][Cd(SCN)<sub>3</sub>] at 298 K.

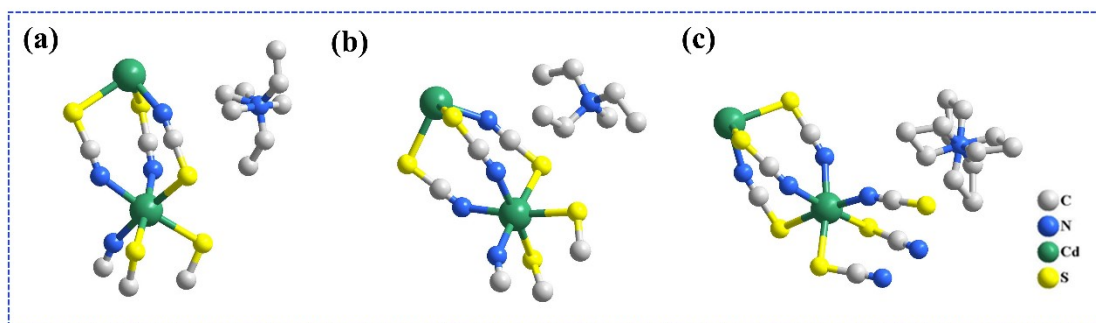

**Fig. S6** (a) Molecular structure of [DEDMA][Cd(SCN)<sub>3</sub>] at 298 K (containing [Cd(SCN)<sub>3</sub>]<sup>-</sup> chains and [DEDMA]<sup>+</sup> cations). (b) Molecular structure of [TEMA][Cd(SCN)<sub>3</sub>] at 286 K (containing [Cd(SCN)<sub>3</sub>]<sup>-</sup> chains and [TEMA]<sup>+</sup> cations). (c) Molecular structure of [TEA][Cd(SCN)<sub>3</sub>] at 293 K (containing [Cd(SCN)<sub>3</sub>]<sup>-</sup> chains and [TEA]<sup>+</sup> cations).

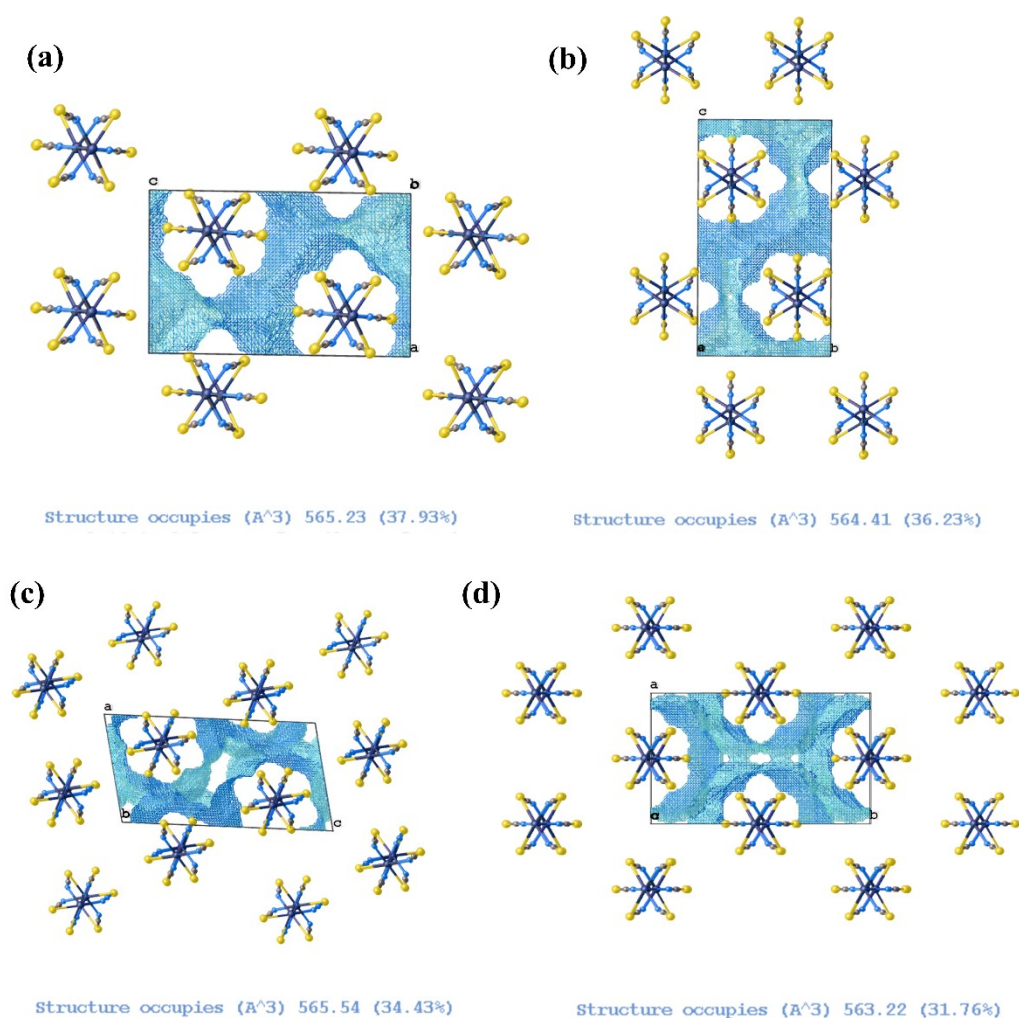

**Fig. S7** (a) Void diagram between anionic frameworks in unit cell of [TMEA][Cd(SCN)<sub>3</sub>]. (b) Void diagram between anionic frameworks in unit cell of [DEDMA][Cd(SCN)<sub>3</sub>]. (c) Void diagram between anionic frameworks in unit cell of [TEMA][Cd(SCN)<sub>3</sub>]. (d) Void diagram between anionic frameworks in unit cell of [TEA][Cd(SCN)<sub>3</sub>].

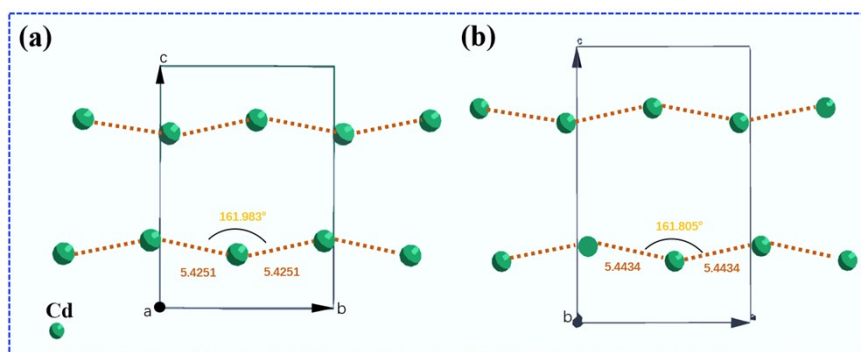

**Fig. S8** Cd-Cd-Cd anion chains arrangement in compounds [TMEA][Cd(SCN)<sub>3</sub>] (a) and [DEDMA][Cd(SCN)<sub>3</sub>] (b).

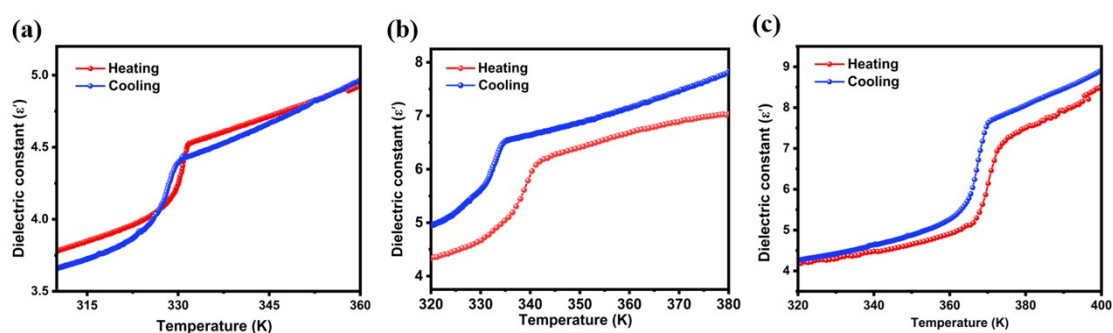

**Fig. S9** Temperature-dependent dielectric constant ( $\epsilon'$ ) in a heating-cooling cycle of (a) [DEDMA][Cd(SCN)<sub>3</sub>], (b) [TEMA][Cd(SCN)<sub>3</sub>], and (c) [TEA][Cd(SCN)<sub>3</sub>].

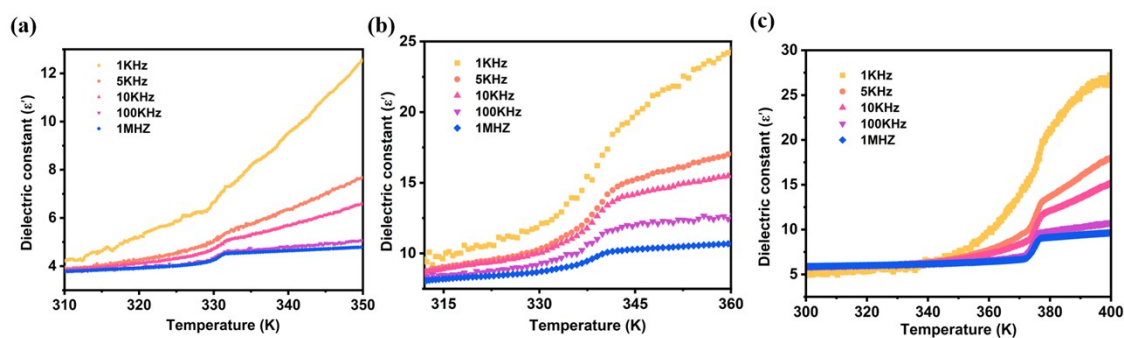

**Fig. S10** Temperature dependence of the real part ( $\epsilon'$ ) of (a) [DEDMA][Cd(SCN)<sub>3</sub>], (b) [TEMA][Cd(SCN)<sub>3</sub>] and (c) [TEA][Cd(SCN)<sub>3</sub>] during the heating process at different frequencies.

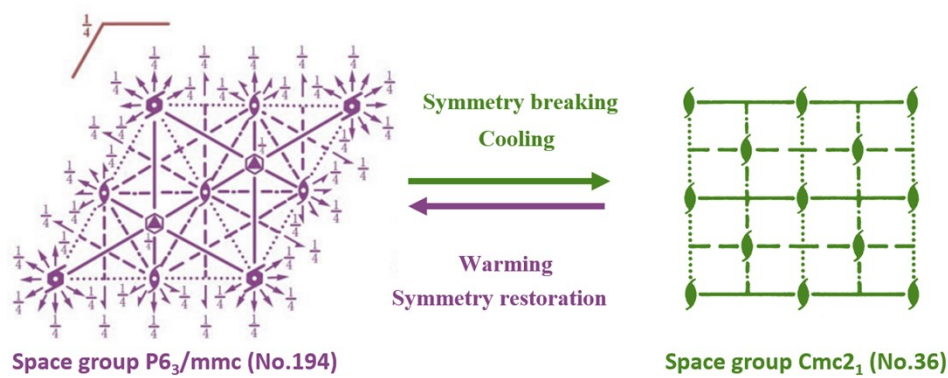

Fig. S11 Symmetry transformations of space group from  $P6_3/mmc$  to  $Cmc2_1$  for  $[\text{TEA}][\text{Cd}(\text{SCN})_3]$ .

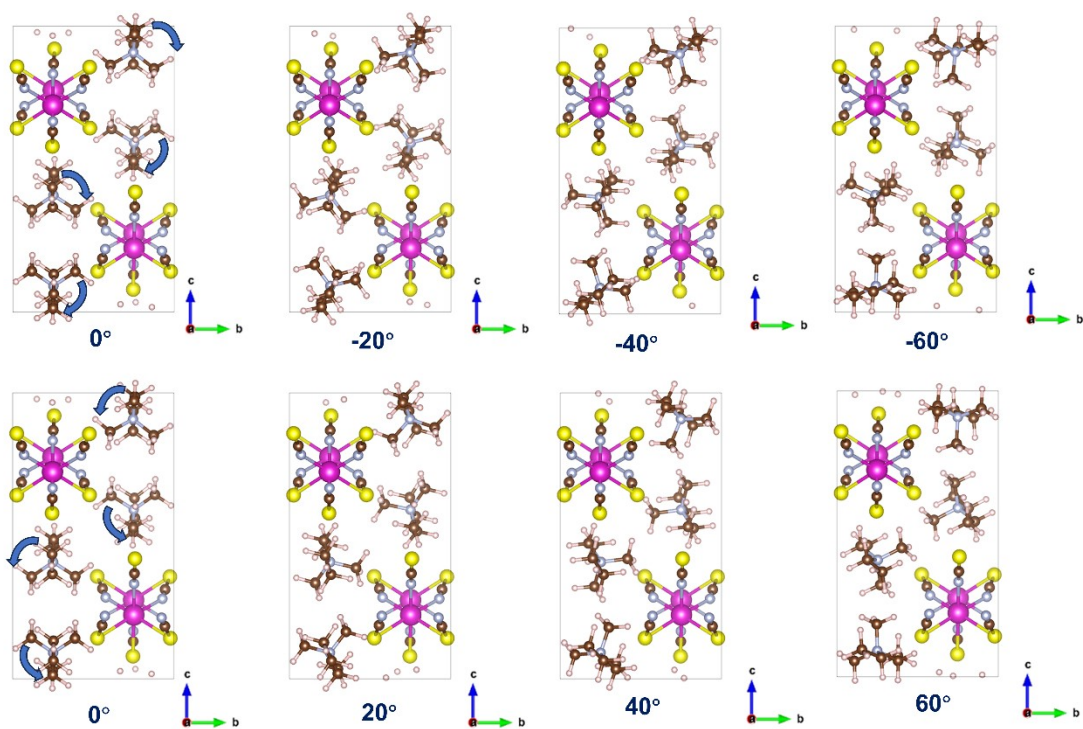

Fig. S12 The Computational models of the energy barrier for the rotation of  $[\text{DEDMA}][\text{Cd}(\text{SCN})_3]$ .



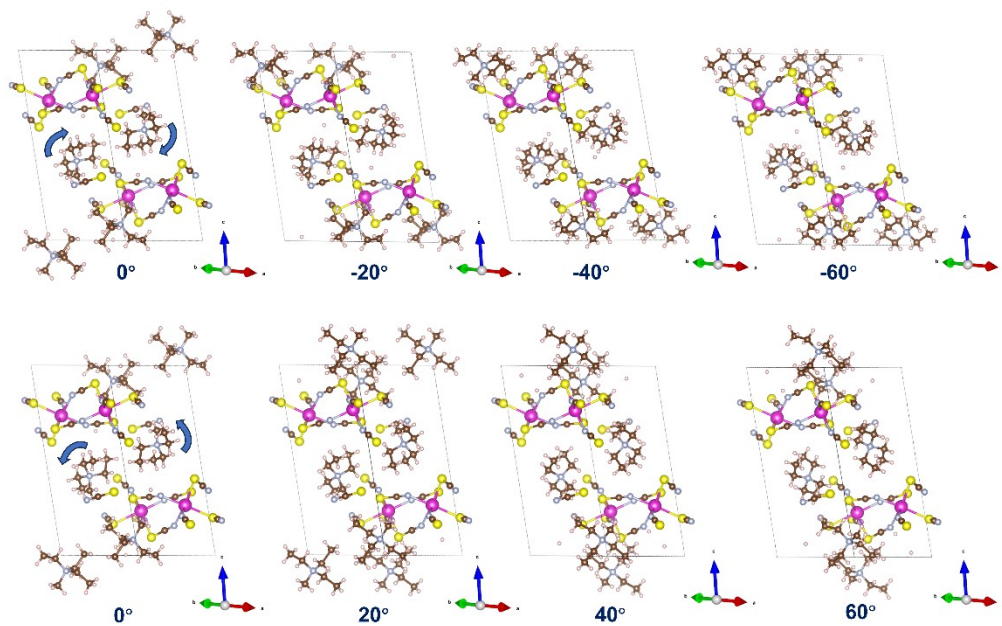

**Fig. S13** The Computational models of the energy barrier for the rotation of [TEMA][Cd(SCN)<sub>3</sub>].

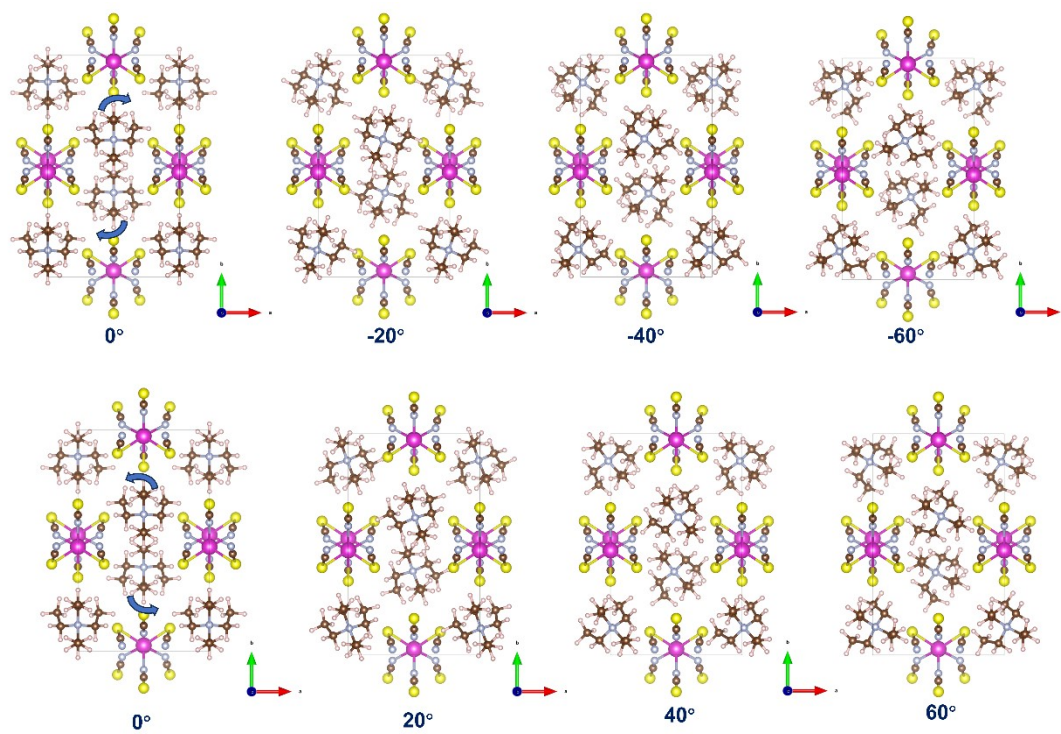

**Fig. S14** The Computational models of the energy barrier for the rotation of [TEA][Cd(SCN)<sub>3</sub>].

**Table S1** Crystal data and structure refinement for [TMEA][Cd(SCN)<sub>3</sub>] at 293 K.

| Compound                     | [TMEA][Cd(SCN) <sub>3</sub> ]                                  |
|------------------------------|----------------------------------------------------------------|
| Temperature                  | 293 K                                                          |
| Empirical formula            | C <sub>8</sub> H <sub>14</sub> CdN <sub>4</sub> S <sub>3</sub> |
| Formula weight               | 374.837                                                        |
| Crystal system               | monoclinic                                                     |
| Space group                  | <i>P2<sub>1</sub>/c</i>                                        |
| <i>a</i> /Å                  | 9.3109(7)                                                      |
| <i>b</i> /Å                  | 10.7164(6)                                                     |
| <i>c</i> /Å                  | 14.9364(11)                                                    |
| <i>α</i> /°                  | 90                                                             |
| <i>β</i> /°                  | 90.634(7)                                                      |
| <i>γ</i> /°                  | 90                                                             |
| <i>V</i> /Å <sup>3</sup>     | 1490.25(18)                                                    |
| <i>Z</i>                     | 4                                                              |
| F(000)                       | 742.4                                                          |
| Radiation                    | Mo Kα (λ = 0.71073)                                            |
| GOF                          | 1.065                                                          |
| R <sub>1</sub> [I ≥ 2σ (I)]  | 0.0784                                                         |
| wR <sub>2</sub> [I ≥ 2σ (I)] | 0.2333                                                         |

**Table S2** Crystal data and structure refinement for [DEDMA][Cd(SCN)<sub>3</sub>] at 298 K and 343K.

| Compound                     | [DEDMA][Cd(SCN) <sub>3</sub> ]                                 |                                                |
|------------------------------|----------------------------------------------------------------|------------------------------------------------|
| Temperature                  | 298.45(10) K                                                   | 343.0 K                                        |
| Empirical formula            | C <sub>9</sub> H <sub>16</sub> CdN <sub>4</sub> S <sub>3</sub> | C <sub>9</sub> CdN <sub>4</sub> S <sub>3</sub> |
| Formula weight               | 388.84                                                         | 372.71                                         |
| Crystal system               | orthorhombic                                                   | hexagonal                                      |
| Space group                  | <i>Pnma</i>                                                    | <i>P6<sub>3</sub>/mmc</i>                      |
| <i>a</i> /Å                  | 10.7498(7)                                                     | 9.448(2)                                       |
| <i>b</i> /Å                  | 9.0463(8)                                                      | 9.448(2)                                       |
| <i>c</i> /Å                  | 16.0214(13)                                                    | 10.894(2)                                      |
| <i>α</i> /°                  | 90                                                             | 90.00(3)                                       |
| <i>β</i> /°                  | 90                                                             | 90.00(3)                                       |
| <i>γ</i> /°                  | 90                                                             | 120.00(3)                                      |
| <i>V</i> /Å <sup>3</sup>     | 1558.0(2)                                                      | 842.1(4)                                       |
| <i>Z</i>                     | 4                                                              | 2                                              |
| F(000)                       | 776.0                                                          | 356.0                                          |
| Radiation                    | Mo Kα (λ = 0.71073)                                            | Mo Kα (λ = 0.71073)                            |
| GOF                          | 1.072                                                          | 1.023                                          |
| R <sub>1</sub> [I ≥ 2σ (I)]  | 0.0854                                                         | 0.1070                                         |
| wR <sub>2</sub> [I ≥ 2σ (I)] | 0.2717                                                         | 0.2122                                         |

**Table S3** Crystal data and structure refinement for [TEMA][Cd(SCN)<sub>3</sub>] at 286 K and 353 K.

| Compound                     | [TEMA][Cd(SCN) <sub>3</sub> ]                                   |                                                 |
|------------------------------|-----------------------------------------------------------------|-------------------------------------------------|
| Temperature                  | 286.00 K                                                        | 353.00 K                                        |
| Empirical formula            | C <sub>10</sub> H <sub>18</sub> CdN <sub>4</sub> S <sub>3</sub> | C <sub>10</sub> CdN <sub>4</sub> S <sub>3</sub> |
| Formula weight               | 402.86                                                          | 384.72                                          |
| Crystal system               | monoclinic                                                      | hexagonal                                       |
| Space group                  | <i>P2<sub>1</sub>/c</i>                                         | <i>P6<sub>3</sub>/mmc</i>                       |
| <i>a</i> /Å                  | 8.984(2)                                                        | 9.703(2)                                        |
| <i>b</i> /Å                  | 10.779(2)                                                       | 9.703(2)                                        |
| <i>c</i> /Å                  | 17.325(5)                                                       | 10.837(2)                                       |
| <i>α</i> /°                  | 90                                                              | 90.00(3)                                        |
| <i>β</i> /°                  | 101.771(7)                                                      | 90.00(3)                                        |
| <i>γ</i> /°                  | 90                                                              | 120.00(3)                                       |
| <i>V</i> /Å <sup>3</sup>     | 1642.4(7)                                                       | 883.5(4)                                        |
| <i>Z</i>                     | 4                                                               | 2                                               |
| F(000)                       | 808.0                                                           | 368.0                                           |
| Radiation                    | Mo Kα (λ = 0.71073)                                             | Mo Kα (λ = 0.71073)                             |
| GOF                          | 1.028                                                           | 1.086                                           |
| R <sub>1</sub> [I ≥ 2σ (I)]  | 0.0716                                                          | 0.1329                                          |
| wR <sub>2</sub> [I ≥ 2σ (I)] | 0.2233                                                          | 0.2879                                          |

**Table S4** Crystal data and structure refinement for [TEA][Cd(SCN)<sub>3</sub>] at 293 K and 393 K.

| Compound                     | [TEA][Cd(SCN) <sub>3</sub> ]                    |                                                 |
|------------------------------|-------------------------------------------------|-------------------------------------------------|
| Temperature                  | 293(2) K                                        | 393.01(10) K                                    |
| Empirical formula            | C <sub>11</sub> CdN <sub>4</sub> S <sub>3</sub> | C <sub>11</sub> CdN <sub>4</sub> S <sub>3</sub> |
| Formula weight               | 396.73                                          | 396.73                                          |
| Crystal system               | orthorhombic                                    | hexagonal                                       |
| Space group                  | <i>Cmc2<sub>1</sub></i>                         | <i>P6<sub>3</sub>/mmc</i>                       |
| <i>a</i> /Å                  | 9.8887(5)                                       | 9.989(2)                                        |
| <i>b</i> /Å                  | 16.6064(6)                                      | 9.989(2)                                        |
| <i>c</i> /Å                  | 10.7989(4)                                      | 10.798(2)                                       |
| <i>α</i> /°                  | 90                                              | 90                                              |
| <i>β</i> /°                  | 90                                              | 90                                              |
| <i>γ</i> /°                  | 90                                              | 120                                             |
| <i>V</i> /Å <sup>3</sup>     | 1773.35(13)                                     | 933.1(4)                                        |
| <i>Z</i>                     | 2                                               | 2                                               |
| F(000)                       | 760.0                                           | 380.0                                           |
| Radiation                    | Mo Kα (λ = 0.71073)                             | Mo Kα (λ = 0.71073)                             |
| GOF                          | 1.094                                           | 1.193                                           |
| R <sub>1</sub> [I ≥ 2σ (I)]  | 0.0314                                          | 0.1401                                          |
| wR <sub>2</sub> [I ≥ 2σ (I)] | 0.0866                                          | 0.2672                                          |

**Table S5** The Void volume and Void occupancy of four compounds. Delete cations in each crystal cell and calculate the remaining void volume through OLEX2 software (Resolution 0.2 Å).

|                                   | [TMEA][Cd(SCN) <sub>3</sub> ] | [DEDMA][Cd(SCN) <sub>3</sub> ] | [TEMA][Cd(SCN) <sub>3</sub> ] | [TEA][Cd(SCN) <sub>3</sub> ] |
|-----------------------------------|-------------------------------|--------------------------------|-------------------------------|------------------------------|
| <b>Cell volume(Å<sup>3</sup>)</b> | 1490.25(18)                   | 1558.0(2)                      | 1640.8(3)                     | 1773.35(13)                  |
| <b>void volume(Å<sup>3</sup>)</b> | 565.66                        | 564.3                          | 565.13                        | 563.17                       |
| <b>Void occupancy</b>             | 37.96%                        | 36.22%                         | 34.44%                        | 31.76%                       |

**Table S6** The energy barrier for the different rotation angles of compounds [DEDMA][Cd(SCN)<sub>3</sub>], [TEMA][Cd(SCN)<sub>3</sub>], and [TEA][Cd(SCN)<sub>3</sub>].

| <b>Rotation angle<br/>(Degree)</b> | <b>Energy for<br/>[DEDMA][Cd(SCN)<sub>3</sub>]<br/>(eV)</b> | <b>Energy for<br/>[TEMA][Cd(SCN)<sub>3</sub>]<br/>(eV)</b> | <b>Energy for<br/>[TEA][Cd(SCN)<sub>3</sub>]<br/>(eV)</b> |
|------------------------------------|-------------------------------------------------------------|------------------------------------------------------------|-----------------------------------------------------------|
| -60                                | 1.72                                                        | 7.05                                                       | 9.71                                                      |
| -40                                | 0.96                                                        | 3.09                                                       | 6.24                                                      |
| -20                                | -0.04                                                       | 0.41                                                       | 2.3                                                       |
| 0                                  | 0                                                           | 0                                                          | 0                                                         |
| 20                                 | -0.07                                                       | 0.53                                                       | 2.3                                                       |
| 40                                 | 0.66                                                        | 2.4                                                        | 6.09                                                      |
| 60                                 | 1.43                                                        | 5.1                                                        | 9.7                                                       |

**Table S7** Datas related to cadmium thiocyanate one-dimensional hybrid materials.

| <b>Compound</b>                                                              | <b>Void<br/>occupancy</b> | <b>Cd-Cd<br/>distances<br/>(Å)</b> | <b>T<sub>p</sub> (K)</b> | <b>Ref</b> |
|------------------------------------------------------------------------------|---------------------------|------------------------------------|--------------------------|------------|
| [CPtmp][Cd(SCN) <sub>3</sub> ]                                               | 31.37%                    | 9.209                              | 247/335/349 K            | 4          |
| [(CH <sub>3</sub> ) <sub>3</sub> PCH <sub>2</sub> F][Cd(SCN) <sub>3</sub> ]  | 38.66%                    | 7.511                              | 318 K                    | 5          |
| [(CH <sub>3</sub> ) <sub>4</sub> P][Cd(SCN) <sub>3</sub> ]                   | 38.51%                    | 7.636                              | 308 K                    | 5          |
| [(CH <sub>3</sub> ) <sub>3</sub> PCH <sub>2</sub> OH][Cd(SCN) <sub>3</sub> ] | 38.66%                    | 7.641                              | 248.5 K                  | 6          |
| [R-(HASD)][Cd(SCN) <sub>3</sub> ]                                            | 32.96%                    | 8.873                              | 365 K                    | 7          |
| [S-(HASD)][Cd(SCN) <sub>3</sub> ]                                            | 32.95%                    | 8.881                              | 365 K                    | 7          |
| [(i-PrNHMe <sub>2</sub> )] [Cd(SCN) <sub>3</sub> ]                           | 38.38%                    | 8.708                              | 328 K                    | 8          |
| [(MeNHEt <sub>2</sub> )] [Cd(SCN) <sub>3</sub> ]                             | 39.48%                    | 8.849                              | 345 K                    | 8          |
| [FMPD][Cd(SCN) <sub>3</sub> ]                                                | 34.58%                    | 7.995                              | 302.5/352.5 K            | 9          |
| [DMIE][Cd(SCN) <sub>3</sub> ]                                                | 41.67%                    | 9.360                              | 248.6 K                  | 10         |
| [DMIFE][Cd(SCN) <sub>3</sub> ]                                               | 34.25%                    | 9.156                              | 295.9 K                  | 10         |
| [DMICE][Cd(SCN) <sub>3</sub> ]                                               | 33.05%                    | 9.262                              | 335.1 K                  | 10         |
| [DMIBE][Cd(SCN) <sub>3</sub> ]                                               | 32.75%                    | 9.333                              | 367.8 K                  | 10         |
| [C <sub>2</sub> H <sub>10</sub> N <sub>2</sub> ]Cd(SCN) <sub>4</sub>         | 53.87%                    | 7.908                              | /                        | 11         |
| [(CH <sub>3</sub> ) <sub>4</sub> N][Cd(SCN) <sub>3</sub> ]                   | 41.14%                    | 7.616                              | /                        | 12         |
| [(CH <sub>3</sub> ) <sub>4</sub> N] <sub>2</sub> [Cd(SCN) <sub>4</sub> ]     | 34.35%                    | 7.300                              | /                        | 12         |
| [H <sub>2</sub> (tmen)][Cd(SCN) <sub>4</sub> ]                               | 40.70%                    | 8.131                              | /                        | 13         |
| [H <sub>2</sub> (tmba)][Cd <sub>2</sub> (SCN) <sub>6</sub> ]                 | 44.14%                    | 7.444                              | /                        | 13         |

|                                                                       |        |       |       |           |
|-----------------------------------------------------------------------|--------|-------|-------|-----------|
| [H <sub>2</sub> (L <sub>2</sub> )]Cd(SCN) <sub>4</sub>                | 32.83% | 9.361 | /     | 14        |
| [(C <sub>3</sub> H <sub>7</sub> ) <sub>4</sub> N]Cd(SCN) <sub>3</sub> | 25.54% | 9.371 | /     | 15        |
| [TMEA]Cd(SCN) <sub>3</sub>                                            | 37.96% | 8.181 | /     | This work |
| [DEDMA]Cd(SCN) <sub>3</sub>                                           | 36.22% | 8.565 | 333 K | This work |
| [TEMA]Cd(SCN) <sub>3</sub>                                            | 34.44% | 8.416 | 342 K | This work |
| [TEA]Cd(SCN) <sub>3</sub>                                             | 31.76% | 9.664 | 375 K | This work |

**Table S8** The bond lengths (Å) and angles (°) of [TMEA]Cd(SCN)<sub>3</sub> in the RTP.

| Atom–Atom           | Length [Å] | Atom–Atom–Atom | Angle [°]  |
|---------------------|------------|----------------|------------|
| Cd1–S1 <sup>1</sup> | 2.737(2)   | S1–Cd1–S2      | 85.67(9)   |
| Cd1–S2 <sup>2</sup> | 2.740(3)   | S1–Cd1–S3      | 85.53(9)   |
| Cd1–S3 <sup>2</sup> | 2.751(3)   | S2–Cd1–S3      | 97.32(10)  |
| Cd1–N2              | 2.309(8)   | N2–Cd1–S1      | 176.89(19) |
| Cd1–N3              | 2.364(8)   | N2–Cd1–S2      | 92.4(2)    |
| Cd1–N4              | 2.389(10)  | N2–Cd1–S3      | 92.3(2)    |
| S1–C6               | 1.644(8)   | N2–Cd1–N3      | 91.0(3)    |
| S2–C7               | 1.600(9)   | N2–Cd1–N4      | 90.2(3)    |
| S3–C8               | 1.594(9)   | N3–Cd1–S1      | 91.2(2)    |
| N2–C6               | 1.143(10)  | N3–Cd1–S2      | 172.6(2)   |
| N3–C7               | 1.176(10)  | N3–Cd1–S3      | 89.1(2)    |
| N4–C8               | 1.190(11)  | N3–Cd1–N4      | 85.3(3)    |
| N1–C5               | 1.473(9)   | N4–Cd1–S1      | 92.2(2)    |
| N1–C4               | 1.468(9)   | N4–Cd1–S2      | 88.2(2)    |
| N1–C2               | 1.463(9)   | N4–Cd1–S3      | 173.9(3)   |
| N1–C3               | 1.483(7)   | C6–S1–Cd1      | 95.9(3)    |
| C5–H5A              | 0.9600     | C7–S2–Cd1      | 98.2(3)    |
| C5–H5B              | 0.9600     | C8–S3–Cd1      | 98.8(3)    |
| C5–H5C              | 0.9600     | C6–N2–Cd1      | 153.6(7)   |
| C4–H4A              | 0.9600     | N2–C6–S1       | 179.5(8)   |
| C4–H4B              | 0.9600     | C7–N3–Cd1      | 143.0(8)   |
| C4–H4C              | 0.9600     | N3–C7–S2       | 175.1(9)   |
| C2–H2A              | 0.9700     | C8–N4–Cd1      | 139.3(9)   |
| C2–H2B              | 0.9700     | C5–N1–C3       | 112.5(19)  |
| C2–C1               | 1.5400(10) | C4–N1–C5       | 104.7(19)  |
| C1–H1A              | 0.9601     | C4–N1–C3       | 106.5(17)  |
| C1–H1B              | 0.9603     | C2–N1–C5       | 115.3(19)  |
| C1–H1C              | 0.9600     | C2–N1–C4       | 117.6(19)  |
| C3–H3A              | 0.9599     | C2–N1–C3       | 100.1(16)  |
| C3–H3B              | 0.9598     | N4–C8–S3       | 173.2(9)   |
| C3–H3C              | 0.9601     | N1–C5–H5A      | 109.5      |
|                     |            | N1–C5–H5B      | 109.5      |
|                     |            | N1–C5–H5C      | 109.5      |
|                     |            | H5A–C5–H5B     | 109.5      |

|            |          |
|------------|----------|
| H5A–C5–H5C | 109.5    |
| H5B–C5–H5C | 109.5    |
| N1–C4–H4A  | 109.5    |
| N1–C4–H4B  | 109.5    |
| N1–C4–H4C  | 109.5    |
| H4A–C4–H4B | 109.5    |
| H4A–C4–H4C | 109.5    |
| H4B–C4–H4C | 109.5    |
| N1–C2–H2A  | 112.1    |
| N1–C2–H2B  | 112.1    |
| N1–C2–C1   | 98.4(17) |
| H2A–C2–H2B | 109.7    |
| C1–C2–H2A  | 112.1    |
| C1–C2–H2B  | 112.1    |
| C2–C1–H1A  | 117.7    |
| C2–C1–H1B  | 107.4    |
| C2–C1–H1C  | 103.0    |
| H1A–C1–H1B | 109.5    |
| H1A–C1–H1C | 109.5    |
| H1B–C1–H1C | 109.5    |
| N1–C3–H3A  | 114.9    |
| N1–C3–H3B  | 109.9    |
| N1–C3–H3C  | 103.4    |
| H3A–C3–H3B | 109.5    |
| H3A–C3–H3C | 109.5    |
| H3B–C3–H3C | 109.5    |

**Symmetry codes:** <sup>1</sup>  $-x+1/2, y-1/2, -z+3/2$ ; <sup>2</sup>  $-x+1/2, y+1/2, -z+3/2$ .

**Table S9** The bond lengths (Å) and angles (°) of [DEDMA][Cd(SCN)<sub>3</sub>] in the RTP.

| Atom–Atom | Length [Å] | Atom–Atom–Atom | Angle [°] |
|-----------|------------|----------------|-----------|
| C1–H1A    | 0.9600     | H1A–C1–H1B     | 109.5     |
| C1–H1B    | 0.9600     | H1A–C1–H1C     | 109.5     |
| C1–H1C    | 0.9600     | H1B–C1–H1C     | 109.5     |
| C1–N1     | 1.510(6)   | N1–C1–H1A      | 109.5     |
| C2–H2A    | 0.9600     | N1–C1–H1B      | 109.5     |
| C2–H2B    | 0.9600     | N1–C1–H1C      | 109.5     |
| C2–H2C    | 0.9600     | H2A–C2–H2B     | 109.5     |
| C2–C3     | 1.313(16)  | H2A–C2–H2C     | 109.5     |
| C3–H3A    | 0.9700     | H2B–C2–H2C     | 109.5     |
| C3–H3B    | 0.9700     | C3–C2–H2A      | 109.5     |
| C3–N1     | 1.425(12)  | C3–C2–H2B      | 109.5     |
| C4–H4A    | 0.9600     | C3–C2–H2C      | 109.5     |
| C4–H4B    | 0.9601     | C2–C3–H3A      | 105.2     |

|                     |           |            |            |
|---------------------|-----------|------------|------------|
| C4-H4C              | 0.9598    | C2-C3-H3B  | 105.2      |
| C4-C5               | 1.420(18) | C2-C3-N1   | 128.5(12)  |
| C5-H5A              | 0.9700    | H3A-C3-H3B | 105.9      |
| C5-H5B              | 0.9700    | N1-C3-H3A  | 105.2      |
| C5-N1               | 1.362(13) | N1-C3-H3B  | 105.2      |
| N1-C1A <sup>1</sup> | 1.491(13) | H4A-C4-H4B | 109.5      |
| N1-C1A              | 1.491(13) | H4A-C4-H4C | 109.5      |
| C6-N2               | 1.131(7)  | H4B-C4-H4C | 109.5      |
| C6-S1               | 1.632(5)  | C5-C4-H4A  | 109.6      |
| C7-N3               | 1.174(11) | C5-C4-H4B  | 109.4      |
| C7-S2               | 1.603(8)  | C5-C4-H4C  | 109.4      |
| Cd1-N2              | 2.376(7)  | C4-C5-H5A  | 103.9      |
| Cd1-N2 <sup>2</sup> | 2.376(7)  | C4-C5-H5B  | 103.9      |
| Cd1-N3              | 2.271(8)  | H5A-C5-H5B | 105.4      |
| Cd1-S1 <sup>3</sup> | 2.756(2)  | N1-C5-C4   | 133.5(14)  |
| Cd1-S1 <sup>4</sup> | 2.756(2)  | N1-C5-H5A  | 103.9      |
| Cd1-S2 <sup>5</sup> | 2.704(3)  | N1-C5-H5B  | 103.9      |
| C1A-H1AA            | 0.9600    | C1-N1-C1   | 167.6(11)  |
| C1A-H1AB            | 0.9600    | C3-N1-C1   | 96.2(5)    |
| C1A-H1AC            | 0.9600    | C3-N1-C1   | 96.2(5)    |
|                     |           | C3-N1-C1A  | 115.0(10)  |
|                     |           | C3-N1-C1A  | 115.0(10)  |
|                     |           | C5-N1-C1   | 86.8(6)    |
|                     |           | C5-N1-C1   | 86.8(6)    |
|                     |           | C5-N1-C3   | 124.0(10)  |
|                     |           | C5-N1-C1A  | 116.8(11)  |
|                     |           | C5-N1-C1A  | 116.8(11)  |
|                     |           | N2-C6-S1   | 175.9(7)   |
|                     |           | N3-C7-S2   | 178.6(8)   |
|                     |           | N2-Cd1-N2  | 83.4(4)    |
|                     |           | N2-Cd1-S1  | 90.92(19)  |
|                     |           | N2-Cd1-S1  | 173.58(17) |
|                     |           | N2-Cd1-S1  | 90.92(18)  |
|                     |           | N2-Cd1-S1  | 173.58(17) |
|                     |           | N2-Cd1-S2  | 91.59(13)  |
|                     |           | N2-Cd1-S2  | 91.59(13)  |
|                     |           | N3-Cd1-N2  | 92.1(2)    |
|                     |           | N3-Cd1-N2  | 92.1(2)    |
|                     |           | N3-Cd1-S1  | 91.13(14)  |
|                     |           | N3-Cd1-S1  | 91.13(14)  |
|                     |           | N3-Cd1-S2  | 175.1(2)   |
|                     |           | S1-Cd1-S1  | 94.58(9)   |
|                     |           | S2-Cd1-S1  | 85.55(5)   |
|                     |           | S2-Cd1-S1  | 85.55(5)   |

|               |          |
|---------------|----------|
| C6–N2–Cd1     | 143.0(7) |
| C7–N3–Cd1     | 158.5(7) |
| C6–S1–Cd1     | 99.1(2)  |
| C7–S2–Cd1     | 95.9(3)  |
| N1–C1A–H1AA   | 109.5    |
| N1–C1A–H1AB   | 109.5    |
| N1–C1A–H1AC   | 109.5    |
| H1AA–C1A–H1AB | 109.5    |
| H1AA–C1A–H1AC | 109.5    |
| H1AB–C1A–H1AC | 109.5    |

**Symmetry codes:** <sup>1</sup> x, -y+3/2, z; <sup>2</sup> x, -y+1/2, z; <sup>3</sup> x-1/2, y, -z+3/2; <sup>4</sup> x-1/2, -y+1/2, -z+3/2; <sup>5</sup> x+1/2, y, -z+3/2.

**Table S10** The bond lengths (Å) and angles (°) of [TEMA][Cd(SCN)<sub>3</sub>] in the RTP.

| Atom–Atom           | Length [Å] | Atom–Atom–Atom | Angle [°]  |
|---------------------|------------|----------------|------------|
| Cd1–S1 <sup>1</sup> | 2.736(2)   | S1–Cd1–S2      | 96.21(6)   |
| Cd1–S2 <sup>1</sup> | 2.741(2)   | S1–Cd1–S3      | 85.66(7)   |
| Cd1–S3 <sup>2</sup> | 2.766(2)   | S2–Cd1–S3      | 84.02(7)   |
| Cd1–N2              | 2.342(6)   | N2–Cd1–S1      | 171.98(17) |
| Cd1–N3              | 2.275(6)   | N2–Cd1–S2      | 90.56(18)  |
| Cd1–N4              | 2.340(6)   | N2–Cd1–S3      | 90.80(19)  |
| S1–C8               | 1.644(7)   | N3–Cd1–S1      | 92.52(17)  |
| S2–C9               | 1.638(7)   | N3–Cd1–S2      | 92.36(17)  |
| S3–C10              | 1.654(7)   | N3–Cd1–S3      | 175.75(16) |
| N2–C8               | 1.165(9)   | N3–Cd1–N2      | 91.5(2)    |
| N3–C10              | 1.159(9)   | N3–Cd1–N4      | 93.8(2)    |
| N4–C9               | 1.156(8)   | N4–Cd1–S1      | 89.71(17)  |
| N1–C2               | 1.505(11)  | N4–Cd1–S2      | 171.22(17) |
| N1–C5               | 1.502(9)   | N4–Cd1–S3      | 89.99(17)  |
| N1–C6               | 1.504(10)  | N4–Cd1–N2      | 83.1(3)    |
| N1–C11              | 1.560(11)  | C8–S1–Cd1      | 98.0(2)    |
| C2–H2A              | 0.9700     | C9–S2–Cd1      | 100.1(2)   |
| C2–H2B              | 0.9700     | C10–S3–Cd1     | 95.4(2)    |
| C2–C3               | 1.493(17)  | C8–N2–Cd1      | 148.2(6)   |
| C3–H3A              | 0.9600     | C10–N3–Cd1     | 154.9(6)   |
| C3–H3B              | 0.9600     | C9–N4–Cd1      | 143.5(6)   |
| C3–H3C              | 0.9600     | N2–C8–S1       | 178.8(7)   |
| C4–H4A              | 0.9600     | N4–C9–S2       | 178.1(7)   |
| C4–H4B              | 0.9600     | N3–C10–S3      | 179.4(7)   |
| C4–H4C              | 0.9600     | C2–N1–C11      | 106.4(7)   |
| C4–C5               | 1.532(13)  | C5–N1–C2       | 114.2(7)   |
| C5–H5A              | 0.9700     | C5–N1–C6       | 107.4(6)   |
| C5–H5B              | 0.9700     | C5–N1–C11      | 110.9(7)   |



|          |           |               |           |
|----------|-----------|---------------|-----------|
| C6-H6A   | 0.9600    | C6-N1-C2      | 109.6(7)  |
| C6-H6B   | 0.9600    | C6-N1-C11     | 108.2(7)  |
| C6-H6C   | 0.9600    | N1-C2-H2A     | 108.9     |
| C7-H7A   | 0.9600    | N1-C2-H2B     | 108.9     |
| C7-H7B   | 0.9600    | H2A-C2-H2B    | 107.7     |
| C7-H7C   | 0.9600    | C3-C2-N1      | 113.5(10) |
| C7-C11   | 1.480(15) | C3-C2-H2A     | 108.9     |
| C11-H11A | 0.9700    | C3-C2-H2B     | 108.9     |
| C11-H11B | 0.9700    | C2-C3-H3A     | 109.5     |
|          |           | C2-C3-H3B     | 109.5     |
|          |           | C2-C3-H3C     | 109.5     |
|          |           | H3A-C3-H3B    | 109.5     |
|          |           | H3A-C3-H3C    | 109.5     |
|          |           | H3B-C3-H3C    | 109.5     |
|          |           | H4A-C4-H4B    | 109.5     |
|          |           | H4A-C4-H4C    | 109.5     |
|          |           | H4B-C4-H4C    | 109.5     |
|          |           | C5-C4-H4A     | 109.5     |
|          |           | C5-C4-H4B     | 109.5     |
|          |           | C5-C4-H4C     | 109.5     |
|          |           | N1-C5-C4      | 114.4(7)  |
|          |           | N1-C5-H5A     | 108.7     |
|          |           | N1-C5-H5B     | 108.7     |
|          |           | C4-C5-H5A     | 108.7     |
|          |           | C4-C5-H5B     | 108.7     |
|          |           | H5A-C5-H5B    | 107.6     |
|          |           | N1-C6-H6A     | 109.5     |
|          |           | N1-C6-H6B     | 109.5     |
|          |           | N1-C6-H6C     | 109.5     |
|          |           | H6A-C6-H6B    | 109.5     |
|          |           | H6A-C6-H6C    | 109.5     |
|          |           | H6B-C6-H6C    | 109.5     |
|          |           | H7A-C7-H7B    | 109.5     |
|          |           | H7A-C7-H7C    | 109.5     |
|          |           | H7B-C7-H7C    | 109.5     |
|          |           | C11-C7-H7A    | 109.5     |
|          |           | C11-C7-H7B    | 109.5     |
|          |           | C11-C7-H7C    | 109.5     |
|          |           | N1-C11-H11A   | 108.1     |
|          |           | N1-C11-H11B   | 108.1     |
|          |           | C7-C11-N1     | 116.7(8)  |
|          |           | C7-C11-H11A   | 108.1     |
|          |           | C7-C11-H11B   | 108.1     |
|          |           | H11A-C11-H11B | 107.3     |

---

Symmetry codes: <sup>1</sup> 1/2-X, 1/2+Y, 3/2-Z; <sup>2</sup> 1/2-X, -1/2+Y, 3/2-Z.

**Table S11** The bond lengths (Å) and angles (°) of [TEA][Cd(SCN)<sub>3</sub>] in the RTP.

| Atom–Atom           | Length [Å] | Atom–Atom–Atom | Angle [°]  |
|---------------------|------------|----------------|------------|
| Cd1–S1 <sup>1</sup> | 2.7460(17) | S1–Cd1–S1      | 97.44(8)   |
| Cd1–S1 <sup>2</sup> | 2.7460(17) | S2–Cd1–S1      | 85.31(4)   |
| Cd1–S2 <sup>3</sup> | 2.733(2)   | S2–Cd1–S1      | 85.31(4)   |
| Cd1–N1 <sup>4</sup> | 2.335(6)   | N1–Cd1–S1      | 170.87(15) |
| Cd1–N1              | 2.335(6)   | N1–Cd1–S1      | 90.34(16)  |
| Cd1–N2              | 2.263(6)   | N1–Cd1–S1      | 90.33(16)  |
| S1–C1               | 1.630(5)   | N1–Cd1–S1      | 170.87(15) |
| S2–C2               | 1.636(7)   | N1–Cd1–S2      | 90.57(14)  |
| N1–C1               | 1.145(7)   | N1–Cd1–S2      | 90.57(14)  |
| N2–C2               | 1.158(10)  | N1–Cd1–N1      | 81.5(3)    |
| C3–N3               | 1.517(10)  | N2–Cd1–S1      | 90.35(11)  |
| C3–C4               | 1.492(18)  | N2–Cd1–S1      | 90.35(11)  |
| N3–C5               | 1.486(9)   | N2–Cd1–S2      | 173.42(16) |
| N3–C5 <sup>5</sup>  | 1.486(9)   | N2–Cd1–N1      | 94.41(18)  |
| N3–C9               | 1.500(9)   | N2–Cd1–N1      | 94.41(18)  |
| N3–C9 <sup>5</sup>  | 1.500(9)   | C1–S1–Cd1      | 99.70(18)  |
| N3–C7 <sup>5</sup>  | 1.513(9)   | C2–S2–Cd1      | 95.2(2)    |
| N3–C7               | 1.513(9)   | C1–N1–Cd1      | 148.0(5)   |
| C5–C6               | 1.570(16)  | C2–N2–Cd1      | 158.3(5)   |
| C8–C9 <sup>5</sup>  | 1.512(16)  | N1–C1–S1       | 179.1(6)   |
| C8–C7               | 1.539(14)  | N2–C2–S2       | 179.3(6)   |
|                     |            | C4–C3–N3       | 116.9(9)   |
|                     |            | C3–N3–C3       | 62.2(12)   |
|                     |            | C5–N3–C3       | 112.2(9)   |
|                     |            | C5–N3–C3       | 79.1(8)    |
|                     |            | C5–N3–C3       | 79.1(8)    |
|                     |            | C5–N3–C3       | 112.2(9)   |
|                     |            | C5–N3–C5       | 66.6(11)   |
|                     |            | C5–N3–C9       | 172.0(10)  |
|                     |            | C5–N3–C9       | 110.5(8)   |
|                     |            | C5–N3–C9       | 172.0(10)  |
|                     |            | C5–N3–C9       | 110.5(8)   |
|                     |            | C5–N3–C7       | 62.2(7)    |
|                     |            | C5–N3–C7       | 107.8(8)   |
|                     |            | C5–N3–C7       | 107.8(8)   |
|                     |            | C5–N3–C7       | 62.2(7)    |
|                     |            | C9–N3–C3       | 108.8(8)   |
|                     |            | C9–N3–C3       | 108.8(8)   |
|                     |            | C9–N3–C3       | 73.8(8)    |
|                     |            | C9–N3–C3       | 73.8(8)    |

|          |           |
|----------|-----------|
| C9–N3–C9 | 71.4(11)  |
| C9–N3–C7 | 64.8(7)   |
| C9–N3–C7 | 113.3(8)  |
| C9–N3–C7 | 64.8(7)   |
| C9–N3–C7 | 113.3(8)  |
| C7–N3–C3 | 166.4(9)  |
| C7–N3–C3 | 104.2(8)  |
| C7–N3–C3 | 166.4(9)  |
| C7–N3–C3 | 104.2(8)  |
| C7–N3–C7 | 89.4(12)  |
| N3–C5–C3 | 51.2(5)   |
| N3–C5–C6 | 114.3(8)  |
| C6–C5–C3 | 118.8(10) |
| C5–C6–C5 | 62.6(9)   |
| C3–C4–C3 | 63.4(10)  |
| C9–C8–C7 | 63.9(6)   |
| N3–C9–C8 | 115.6(9)  |
| N3–C7–C8 | 113.3(8)  |
| N3–C7–C9 | 57.2(5)   |
| C8–C7–C9 | 57.2(7)   |

**Symmetry codes:** <sup>1</sup>  $-x+2, -y+1, z+1/2$ ; <sup>2</sup>  $x, -y+1, z+1/2$ ; <sup>3</sup>  $-x+2, -y+1, z-1/2$ ; <sup>4</sup>  $-x+2, y, z$ ; <sup>5</sup>  $-x+1, y, z$ .

## Reference

1. G. Kresse and J. Furthmüller, *Comput. Mater. Sci.*, 1996, **6**, 15-50.
2. P. E. Blöchl, *Phys. Rev. B*, 1994, **50**, 17953-17979.
3. J. P. Perdew, M. Ernzerhof and K. Burke, *J. Chem. Phys.*, 1996, **105**, 9982-9985.
4. L. Zhou, R.-X. Li, P.-P. Shi, Q. Ye and D.-W. Fu, *Inorg. Chem.*, 2020, **59**, 18174-18180.
5. Y.-J. Cao, L. Zhou, P.-P. Shi, Q. Ye and D.-W. Fu, *Chem. Commun.*, 2019, **55**, 8418-8421.
6. X. Zheng, P.-P. Shi, Y. Lu, L. Zhou, J.-X. Gao, F.-J. Geng, D.-H. Wu, D.-W. Fu and Q. Ye, *Inorg. Chem. Front.*, 2017, **4**, 1445-1450.
7. H. Gao, Y.-D. Chen, T. Zhang, J.-Z. Ge, D.-W. Fu and Y. Zhang, *Inorg. Chem.*, 2022, **61**, 10872-10879.
8. S.-Y. Zhang, X. Shu, Y. Zeng, Q.-Y. Liu, Z.-Y. Du, C.-T. He, W.-X. Zhang and X.-M. Chen, *Nat. Commun.*, 2020, **11**, 2752.
9. Y.-Z. Wang, Z.-X. Zhang, C.-Y. Su, T. Zhang, D.-W. Fu and Y. Zhang, *Dalton Trans.*, 2021, **50**, 3841-3847.
10. L. He, L. Zhou, P.-P. Shi, Q. Ye and D.-W. Fu, *Chem. Mater.*, 2019, **31**, 10236-10242.
11. H. Souidi, H. Triki and S. Kamoun, *J. Mol. Struct.*, 2021, **1232**, 129994.
12. Y. Kuniyasu, Y. Suzuki, M. Taniguchi and A. Ouchi, *Bul. Chem. Soc. Jpn.*, 1987, **60**, 179-183.
13. B. Guo, X. Zhang, J.-H. Yu and J.-Q. Xu, *Dalton Trans.*, 2015, **44**, 11470-11481.
14. R.-Y. Wang, J.-H. Yu and J.-Q. Xu, *Dalton Trans.*, 2019, **48**, 5674-5682.
15. M. Taniguchi and A. Ouchi, *Bul. Chem. Soc. Jpn.*, 1989, **62**, 424-428.
